# Supplementary material for: Characterization of Parkinson’s disease using blood-based biomarkers: A multicohort proteomic analysis
Source: PLoS Med. 2019 Oct 11;16(10):e1002931. doi: 10.1371/journal.pmed.1002931 (PMC6788685; doi:10.1371/journal.pmed.1002931)
Supplement: S1 Table — Proteins showing coefficient of variation greater than 20%, and more than 25% of measurements outside either the LLOD or ULOD were excluded form downstream analyses. Out of 1,129 proteins, 161 were excluded. LEDD, levodopa equivalent daily dose; LLOD, lower limit of detection; NC, neurologically normal control; PD, Parkinson’s disease; RFU, relative fluorescence unit; ULOD, upper limit of detection. (XLSX) [file pmed.1002931.s005.xlsx]

## Sheet: Discovery Cohort
S1 Table. SomaScan levels (log10 of RFU) of 1129 proteins, and demographic data for 141 subjects (96 PD and 45 NC) from Discovery (Udall) cohort. Proteins showing coefficient of variation greater than 20%, and more than 25% of measurements outside either the Lower Limit of Detection (LLOD) or Upper Limit of Detection (ULOD) were excluded form downstream analyses. Out of 1129 proteins 161 were exc…
ID	Treatment Group	Age at Sample	Sex	LEDD	C4b	Coagulation Factor XI	CTACK	Endostatin	TIMP-1	tPA	EG-VEGF	TIMP-2	TGF-b1	VEGF sR3	C5	Apo E	BDNF	bFGF-R	C8	Cathepsin G	CXCL16 soluble	FGF-10	FGF-8B	GIIE	GV	IL-12	MIP-3a	SAP	SCF sR	TIMP-3	TWEAK	Angiopoietin-4	Cadherin E	GFRa-3	Ephrin-B3	GFRa-2	6Ckine	RANTES	HMG-1	OPG	b-Endorphin	Factor I	IGFBP-2	IGFBP-3	Leptin	MCP-1	MMP-9	Myeloperoxidase	PRL
1	PD	64	Female	799.9	2.18213	3.44036	3.19165	4.68629	2.58433	2.63134	2.52569	2.8433	3.26188	3.88021	3.81809	4.20946	2.83948	3.94304	3.62262	3.09636	4.0957	2.31006	3.3536	2.36903	2.57542	3.19947	2.29973	4.59301	4.29918	2.83366	2.39111	2.61055	4.71409	3.22774	2.84566	3.90662	3.93084	3.74401	4.66178	4.22047	2.76997	4.78056	4.70984	3.14457	3.87625	2.74155	4.46225	4.29182	2.91572
2	PD	75	Female	1625	2.02449	3.28463	3.14758	4.76395	2.69135	2.58467	2.50133	2.92221	3.87022	3.52388	3.78377	4.24512	2.72057	3.94304	3.669	3.09636	3.97245	2.28353	3.3536	2.36003	2.54394	3.19947	2.25091	4.48778	4.06239	2.77422	2.41397	2.68556	4.73563	3.24628	2.87175	3.91634	4.14351	3.63955	4.10652	4.24503	2.66417	4.72461	4.95403	2.99935	3.61506	2.67052	4.45699	4.50747	2.89878
3	PD	64	Male	840	2.15442	3.3714	3.06674	4.61675	2.69671	2.74304	2.43441	2.80564	3.34838	3.45699	3.81252	4.5197	3.16167	3.94304	3.67372	3.09636	4.07895	2.40002	3.3536	2.38112	2.61563	3.19947	2.35526	4.41355	3.93638	3.25271	2.48799	2.80127	4.62116	3.22774	2.8827	3.86714	3.8832	4.3273	4.02538	4.21506	2.61331	4.71378	4.56203	3.0057	3.55949	2.61352	4.57701	3.96306	3.28074
4	PD	86	Female	1550	2.29667	3.22804	3.18358	4.61045	2.66642	2.61595	2.47524	2.84248	3.35633	3.56855	3.72501	4.48608	3.24765	3.94304	3.51234	3.09636	3.99876	2.29994	3.3536	2.39358	2.47654	3.19947	3.09906	4.46644	4.3258	3.68503	2.49415	2.736	4.60741	3.22774	3.0251	3.76065	3.82613	4.22235	4.13368	4.05496	2.76975	4.6847	4.64503	3.07096	3.74338	3.34592	4.39958	4.29465	3.20123
5	PD	73	Male	1349.78	2.01199	3.39307	3.13966	4.68707	2.55157	2.68233	2.52466	2.83664	3.24986	3.69773	3.90685	4.54632	2.81084	3.94304	3.65673	3.09636	4.02808	2.34889	3.3536	2.39863	2.53857	3.19947	2.28892	4.70026	4.09238	2.80318	2.38471	2.72032	4.70702	3.22774	2.84566	3.83891	3.88616	3.85408	4.08027	4.16553	2.61194	4.77537	4.72217	3.08475	3.48163	2.65935	4.59777	4.31501	3.28661
6	PD	81	Male	1600	2.2307	3.3118	3.26578	4.68779	2.61627	2.60108	2.4908	2.91259	3.22412	3.64576	3.86161	4.0569	2.8099	3.94304	3.68072	3.09636	4.065	2.34321	3.3536	2.36549	2.52192	3.19947	2.18639	4.71453	4.216	2.74178	2.35257	2.69609	4.74961	3.22774	2.97044	3.98607	3.98382	3.74173	3.94345	4.22646	2.63337	4.77793	4.89312	2.88383	3.29172	2.74881	4.54282	4.30157	2.79463
7	PD	63	Male	900	1.81023	3.3548	3.16882	4.68589	2.42959	2.78512	2.55255	2.74733	3.26874	3.7839	3.85143	4.33581	2.84899	3.94304	3.79019	3.09636	4.08214	2.38917	3.37776	2.51028	2.57089	3.19947	2.25672	4.67595	4.1458	2.89818	2.3948	2.69714	4.80087	3.22774	2.85406	3.93532	3.82972	3.80593	3.90786	4.38665	3.08536	4.73851	4.84598	2.94196	4.35883	2.67879	4.347	4.45453	2.86522
8	PD	58	Female	0	2.34498	3.40449	3.1179	4.74241	2.57519	2.69381	2.52414	2.80421	3.22866	3.68736	3.86257	4.49567	2.94335	3.94304	3.65046	3.09636	4.0714	2.32243	3.3536	2.38934	2.56348	3.19947	2.28353	4.6035	4.302	3.04104	2.35641	2.66389	4.75784	3.22774	2.97304	4.02556	4.01261	3.81389	4.28876	4.17853	2.57287	4.87896	4.47443	3.055	4.01347	2.77822	4.26632	4.41993	3.04995
9	PD	64	Male	1449.8	2.09899	3.40731	3.07041	4.64923	2.44404	2.73304	2.54937	2.73672	3.30313	3.6909	3.86802	4.66912	3.25105	3.94304	3.69317	3.09636	4.21784	2.39881	3.3536	2.44623	2.56526	3.19947	2.3032	4.76145	4.4091	3.08504	2.45179	2.68422	4.79442	3.22774	2.85612	3.83331	3.74895	4.54436	3.91751	4.24054	2.83525	4.82984	4.63562	3.10829	3.50172	2.86207	4.57274	4.29844	3.00333
10	PD	70	Male	400	2.59605	3.4	2.98677	4.64014	2.54568	2.64048	2.43696	2.79948	3.30557	3.87304	3.76515	4.32555	3.1285	3.94304	3.77833	4.71578	3.94855	2.47451	3.3536	2.35984	2.46879	3.19947	2.38792	4.60037	4.05939	3.30231	2.38435	4.08615	4.6758	3.44813	2.94236	3.8098	3.82692	4.31071	4.37512	4.20386	2.63969	4.65312	4.79621	3.02971	3.31137	2.70808	4.50389	4.231	3.25773
11	PD	65	Male	300	2.07225	3.2785	3.21328	4.86911	2.47553	2.78526	2.49638	2.6682	3.2788	3.71695	3.87484	4.36098	2.87978	3.94304	3.6879	3.09636	4.12186	2.46434	3.3536	2.38934	2.57692	3.19947	2.24895	4.72366	3.99038	2.91529	2.39428	2.7209	4.80984	3.22774	2.86475	3.82321	3.93456	4.10138	4.02597	4.25715	2.53007	4.76127	4.68471	2.89801	3.73277	2.66276	4.60988	4.27875	2.9195
12	PD	65	Female	199.95	2.09587	3.23548	3.0937	4.65948	2.55666	2.71625	3.22668	2.75488	3.29383	3.92666	3.779	4.53953	2.96708	3.94304	4.19251	3.09636	4.04599	2.32181	3.3536	2.3731	2.52297	3.19947	2.30963	4.5049	4.28002	3.0389	2.37967	2.7801	4.72835	3.22774	2.8275	3.87354	3.8029	4.19398	4.08265	4.30252	2.82465	4.74378	4.83684	3.00505	3.76588	2.78838	4.36511	4.37281	3.32426
13	PD	78	Female	649.9	2.32346	3.17319	3.09913	4.62189	2.47625	2.61023	2.49499	2.7819	3.27107	3.55524	3.76831	4.5132	3.03723	3.94304	3.60985	3.09636	3.95415	2.33405	3.3536	2.37273	2.58274	3.19947	2.31681	4.506	4.22169	3.19382	2.33766	2.82698	4.71337	3.22774	2.87887	3.75952	3.82982	4.19903	3.96685	4.18718	2.67052	4.72461	4.6427	3.04485	3.90218	2.76745	4.47253	4.20586	3.0508
14	PD	76	Female	1339.8	2.46538	3.22199	3.08803	4.75102	2.71858	2.67256	2.52569	2.87789	3.26195	3.74503	3.73865	4.24743	2.95794	4.06174	3.62226	3.09636	4.19567	2.35851	3.3536	2.40398	2.53681	3.19947	2.2615	4.53033	3.91854	2.91381	2.39742	2.67952	4.66826	3.22774	2.89098	3.94922	3.8496	4.11758	3.84662	4.17116	2.63649	4.68658	4.84543	3.03806	3.53419	2.64601	4.15919	4.17617	3.03755
15	PD	68	Female	520	2.05423	3.34891	3.20352	4.70396	2.53288	2.74273	2.50079	2.79595	3.44451	3.66484	3.78496	4.59793	3.04155	3.94304	3.6982	3.09636	4.05577	2.31911	3.3536	2.39498	2.52917	3.19947	2.3653	4.5296	4.1718	3.01051	2.42781	2.63478	4.7026	3.22774	2.9008	3.9207	3.86713	3.96854	4.17246	4.26085	2.75205	4.71239	4.7188	3.05881	4.02488	2.74515	4.41504	4.30478	2.99423
16	PD	64	Male	200	1.99344	3.2538	3.21429	4.59827	2.50501	2.60021	2.50352	2.85071	3.3351	3.66971	3.73474	4.16068	3.16888	3.94304	3.72315	3.09636	4.05836	2.3483	3.3536	2.43886	2.53314	3.19947	2.34655	4.51697	4.20416	3.10711	2.43201	2.67321	4.68476	3.22774	2.85315	3.90882	3.8347	4.39493	4.13522	4.26259	2.64018	4.71452	4.78894	3.08533	3.26271	2.75442	4.69592	4.31247	3.00022
17	PD	70	Female	1560	1.82217	3.15229	3.1522	4.68076	2.58195	2.69417	2.52114	2.75035	3.33345	3.63933	3.78245	4.20975	2.95626	3.94304	3.65147	3.09636	4.12617	2.35218	3.3536	2.42243	2.56289	3.19947	2.27852	4.6428	4.06656	3.02967	2.30535	2.6637	4.65759	3.22774	3.12126	3.89723	3.84831	4.10607	4.18599	4.19676	2.61658	4.74621	4.45154	3.03129	4.22951	2.64816	4.39707	4.35339	2.89911
18	PD	77	Female	1700	2.06707	3.40389	3.15597	4.65797	2.47524	2.81371	2.47188	2.72198	3.28594	3.71898	3.86896	4.2819	3.16173	3.94304	3.61266	3.09636	4.08677	2.34439	3.3536	2.36549	2.57784	3.36551	2.26387	4.65283	4.2111	3.38268	2.34124	2.68824	4.73632	3.22774	2.84751	3.91478	3.7127	4.27898	4.11334	4.18562	3.58181	4.83832	4.35515	3.08138	4.12357	2.84634	4.30288	4.31384	2.97982
19	PD	68	Female	725	2.4501	3.30859	3.08767	4.57492	2.51667	2.80161	2.44592	2.76087	3.22152	3.53265	3.8756	4.23097	2.93349	3.82685	3.56173	3.09636	4.07748	2.39146	3.50909	2.45271	2.55461	3.19947	2.39305	4.67374	4.04506	2.96694	2.42684	2.68869	4.62922	3.22774	2.82145	3.74732	3.77615	4.02906	3.6965	4.08693	2.89025	4.79103	4.57613	3.72168	4.16464	2.77262	4.47495	4.36585	3.32467
20	PD	78	Male	1200	2.08707	3.25864	3.13127	4.63728	2.57392	2.7532	2.50664	2.86829	3.25319	3.60611	3.86475	4.46435	2.77634	3.94304	3.70136	3.09636	4.09075	2.33102	3.3536	2.39811	2.50147	3.19947	2.25959	4.71906	4.1284	2.78817	2.38021	2.67071	4.68142	3.22774	2.84954	3.92224	3.77081	3.75443	3.90293	4.29176	2.4707	4.80037	4.74738	3.0251	3.55772	2.79671	4.21678	4.20658	2.98408
21	PD	70	Female	1000	2.14613	3.29164	3.14616	4.74437	2.65533	2.77327	2.52362	2.86082	3.27028	3.83999	3.80339	4.50289	2.83091	3.94304	3.67191	3.09636	4.13032	2.35122	3.3536	2.40175	2.53326	3.19947	2.28511	4.51731	4.16853	2.7775	2.27554	2.67385	4.79408	3.22774	2.94176	4.1426	3.78981	3.76627	4.01916	4.24319	2.86953	4.72462	4.72144	3.20863	3.69413	2.77822	4.42969	4.14437	2.88502
22	PD	79	Female	700	2.55751	3.37502	3.12727	4.68228	2.42862	2.9527	2.46225	2.79435	3.29592	3.7083	3.89535	4.44085	3.04801	3.82039	3.67061	3.09636	3.99347	2.34361	3.3536	2.40722	2.53832	3.19947	2.24625	4.58589	4.11669	2.93237	2.34811	2.71725	4.68421	3.22774	2.89905	3.73388	3.73474	4.10078	3.93413	4.23595	2.61215	4.81651	4.37731	3.14192	4.17381	2.62024	4.60792	4.28179	3.17336
23	PD	85	Male	2250	2.07882	3.25943	3.19783	4.76235	2.70018	2.72558	2.43632	2.78504	3.30895	3.61111	3.8197	4.23781	2.92598	3.94304	3.60286	3.09636	4.12964	2.33163	3.3536	3.38322	2.57368	3.19947	2.24724	4.67371	3.89772	3.16876	2.27898	2.83193	4.71062	3.37974	2.89955	3.88888	3.81733	4.10919	4.13226	4.16172	2.68601	4.72442	4.71182	2.89304	3.63243	2.66633	4.26231	4.37528	2.99388
24	PD	66	Male	650	1.87157	3.33195	3.15033	4.71717	2.74076	2.45163	2.53441	2.87105	3.26656	3.65838	3.80604	4.21626	3.10023	3.94304	3.73271	3.09636	3.97855	2.31806	3.3536	2.33163	2.50866	3.19947	2.30341	4.56369	4.04841	3.0202	2.33726	2.70355	4.75245	3.22774	2.86016	3.83382	4.07043	4.29419	4.04783	4.18753	2.59934	4.75541	4.97306	2.93197	3.14962	2.74749	4.24633	4.30611	3.16026
25	PD	68	Female	1816.5	2.40243	3.35536	3.22438	4.67824	2.59084	2.67256	2.4101	3.03157	3.30016	3.83188	3.88566	4.14975	2.83302	4.10856	3.73566	3.09636	4.18299	2.31345	3.3536	2.3784	2.49374	3.19947	2.21484	4.54713	4.43854	2.94822	2.29601	2.61542	4.86354	3.22774	2.95674	4.02356	3.9961	3.82029	3.88698	4.31464	2.61888	4.79509	5.11151	3.07254	3.21595	2.59671	4.33798	4.05057	2.86171
26	PD	69	Female	1200	1.84448	3.25708	3.0958	4.79831	2.50256	2.80983	2.4679	2.71357	3.26062	3.61049	3.8156	4.55559	3.06092	3.94304	3.7115	3.09636	4.01514	2.38828	3.3536	2.39182	2.58035	3.19947	2.43377	4.21256	4.0291	3.2141	2.40346	2.66257	4.72473	3.22774	2.89298	3.88677	3.90122	4.17046	4.10266	4.26377	2.80264	4.72761	4.69562	3.08522	3.85348	2.76087	4.56161	4.37849	3.18873
27	PD	65	Male	699.9	2.14551	3.19285	3.2414	4.77014	2.58647	2.67477	2.54345	2.76425	3.27671	3.84364	3.7987	4.48842	3.16215	4.08406	3.65576	3.09636	4.19454	2.35564	3.3536	2.49762	2.52853	3.19947	2.36624	4.62332	4.06318	3.2237	2.44948	2.65963	4.73037	3.22774	2.84862	4.04172	3.67192	4.15266	4.24865	4.21429	2.69949	4.71922	4.92188	3.05162	3.54894	2.88643	4.6998	4.37976	2.9058
28	PD	66	Male	450	1.92117	3.25259	3.12821	4.77426	2.5214	2.6248	2.50311	2.7391	3.27935	3.73017	3.80541	4.42778	2.9683	3.94304	3.74174	3.09636	4.14411	2.36173	3.3536	2.40807	2.55534	3.19947	2.27967	4.7018	4.11096	3.04387	2.44902	2.71096	4.84226	3.22774	2.87973	3.81807	3.94509	4.3723	3.9282	4.25176	2.94606	4.77674	4.94221	3.03898	3.36724	2.73288	4.33183	4.41749	2.90347
29	PD	57	Male	1300	2.21722	3.18503	3.18828	4.64801	2.47217	2.67025	2.49707	2.68842	3.27713	3.83544	3.86711	4.59416	3.12267	3.94304	3.62832	3.09636	4.08263	2.47465	3.3536	2.39533	2.57484	3.19947	2.27439	4.71666	4.18262	3.06262	2.38703	2.75838	4.64302	3.22774	2.92283	3.82456	4.09494	4.33154	4.04866	4.20252	2.90773	4.75556	4.43572	3.02983	3.58018	2.59006	4.26345	4.3309	3.20069
30	PD	69	Male	550	2.10992	3.24952	3.10633	4.65744	2.47611	2.77048	2.55011	2.83251	3.25428	3.77112	3.82361	4.38031	2.96633	4.06655	3.71537	3.09636	4.2055	2.38274	3.3536	2.50515	2.56003	3.19947	2.27944	4.61436	4.10431	2.98749	2.38417	2.69417	4.81915	3.22774	2.85352	3.97424	3.83858	4.02432	3.92648	4.29744	2.93303	4.80389	4.76953	3.00195	3.27763	2.69099	4.49267	4.36334	3.2204
31	PD	59	Male	550	2.13194	3.27862	3.07383	4.60509	2.48544	2.54233	2.43569	2.77232	3.33506	3.76885	3.75644	4.55209	3.11942	3.81851	3.57004	3.09636	3.91415	2.3638	3.3536	2.35622	2.56514	3.19947	2.30984	4.50112	4.01883	3.09792	2.41814	2.77996	4.67572	3.22774	2.98155	3.94317	3.7935	4.3482	4.05327	4.15598	2.64118	4.69205	4.53305	3.10096	3.34284	2.60563	4.24935	4.21002	3.00847
32	PD	54	Male	100	2.20303	3.2578	3.25978	4.6425	2.58569	2.59384	2.48387	2.88621	3.29195	3.57187	3.79443	4.43967	2.88178	3.94304	3.67165	3.09636	4.10616	2.31994	3.3536	2.36866	2.55023	3.19947	2.23779	4.52515	4.23849	2.82847	2.3995	2.68332	4.70844	3.96766	2.85872	3.83972	3.90624	4.23599	3.98087	4.30952	2.78347	4.75506	4.85499	3.0381	3.17975	2.64699	4.17442	4.10095	3.04084
33	PD	63	Female	600	2.23855	3.4419	3.23251	4.71051	2.64513	2.47986	2.48259	2.8302	3.27914	3.61944	3.9031	4.28451	2.9432	3.94304	3.65817	3.09636	4.14701	2.36773	3.3536	2.37894	2.55461	3.19947	2.27852	4.50545	4.08502	3.22471	2.35141	2.68458	4.71103	3.22774	2.87355	3.85109	3.7677	4.0894	4.01673	4.22212	2.67376	4.76566	4.83544	3.01978	3.58554	2.64345	4.39312	3.96729	2.88167
34	PD	68	Male	900	2.06032	3.3328	3.16862	4.88308	2.74147	2.52022	2.53732	2.8598	3.23977	3.67321	3.86829	4.23322	2.9127	3.94304	3.62132	3.09636	4.13216	2.3251	3.3536	2.40209	2.5311	3.19947	2.41697	4.80402	4.15345	2.69914	2.31006	2.71357	4.73519	3.22774	2.87227	3.87247	3.90175	4.00847	3.90345	4.25345	2.48841	4.79768	5.04605	2.99878	3.19401	2.80645	4.48189	4.35363	2.74842
35	PD	60	Female	749.85	2.20194	3.41189	3.053	4.64633	2.54802	2.78111	2.5738	2.84819	3.27914	3.69895	3.87411	4.32379	2.77298	3.94304	3.65553	3.09636	4.19146	2.38364	3.3536	2.38021	2.50637	3.19947	2.26951	4.52863	4.17432	2.80284	2.39358	2.66605	4.69218	3.22774	2.85986	3.86874	3.96854	3.78307	4.07867	4.23873	2.73191	4.73133	4.66005	3.03423	4.11621	2.73775	4.36086	4.23689	3.08084
36	PD	73	Male	0	2.21932	3.34058	3.12097	4.75752	2.62972	2.78476	2.48954	2.83734	3.33415	3.71452	3.84551	4.09937	3.02156	3.94304	3.63095	3.09636	4.10848	2.35603	3.3536	2.40722	2.55871	3.19947	2.29645	4.59704	4.09685	2.93556	2.3707	2.77283	4.70242	3.22774	2.88338	3.85168	3.85319	4.40697	4.09407	4.23937	2.66361	4.76926	4.63136	2.95187	3.54468	2.6505	4.4695	4.22734	3.09342
37	PD	78	Male	1199.8	2.3189	3.23985	3.20669	4.7584	2.71834	2.68142	2.58343	2.80264	3.24316	3.71108	3.82124	4.50099	2.99813	3.94304	3.61244	3.09636	4.19279	2.36229	3.3536	2.52608	2.55376	3.19947	2.29358	4.66983	3.9398	3.07177	2.37144	2.72795	4.73817	3.3041	2.8651	3.98387	3.83851	4.13448	3.87063	4.15395	2.73862	4.80597	4.79019	2.84454	3.7793	2.79127	4.81028	4.42021	3.39625
38	PD	67	Male	1000	2.11261	3.33027	3.19165	4.73697	2.45773	2.71925	2.50678	2.74461	3.26342	3.66184	3.89828	4.63939	3.04269	3.94304	3.63456	3.09636	4.07542	2.3784	3.3536	2.37985	2.55035	3.19947	2.27021	4.6576	4.17336	2.92231	2.30255	2.67284	4.72997	3.22774	2.84911	3.81184	3.75331	4.00628	4.04621	4.23482	2.73046	4.80084	4.86578	3.02102	3.32267	2.67897	4.53101	4.30224	3.09604
39	PD	82	Female	100	1.95134	3.32773	3.15174	4.71053	2.50365	2.72526	2.49374	2.78412	3.27704	3.77835	3.8622	4.62263	3.07092	3.94304	3.65919	3.09636	4.15049	2.51322	3.3536	2.52388	2.61763	3.53377	2.36135	4.54864	4.01241	3.21163	2.40756	2.73352	4.69712	3.22774	2.90151	3.89734	3.96576	4.0216	3.91294	4.27582	2.76155	4.71134	4.70976	3.03133	3.84077	2.66257	4.39747	4.40426	3.34799
40	PD	57	Female	0	2.14891	3.36853	3.08511	4.62545	2.54986	2.55847	2.51891	2.76671	3.55425	3.83194	3.82459	4.49197	3.14161	3.94304	3.62479	3.09636	4.03116	2.30878	3.3536	2.41229	2.62076	3.19947	2.31952	4.55167	4.19277	3.24541	2.68673	3.03072	4.69628	3.43935	3.20306	3.80689	3.87338	4.55972	3.82259	4.21074	2.77444	4.74324	4.83244	3.20927	3.59794	2.71046	4.36493	4.29511	2.98137
41	PD	79	Male	600	2.20385	3.36896	3.16426	4.61212	2.47217	2.73336	2.58984	2.8554	3.41105	3.62989	3.83539	4.44023	3.11647	3.94304	3.65501	3.09636	4.02355	2.35044	3.3536	2.3681	2.56526	3.19947	2.42943	4.59979	4.09131	3.10278	2.43917	3.07671	4.65521	3.32805	3.01406	3.77322	3.90183	4.25909	4.16727	4.21674	2.71391	4.71197	4.59132	3.04571	3.40661	2.71063	4.3222	4.29364	3.26581
42	PD	68	Male	724.9	2.38382	3.31397	3.09708	4.70009	2.61321	2.62138	2.455	2.75228	3.26333	3.64537	3.92517	4.47988	2.94245	3.94304	3.64949	3.09636	3.98528	2.31618	3.3536	2.35564	2.96853	3.19947	2.24527	4.74843	4.198	3.00805	2.34947	2.73424	4.67517	3.22774	2.99739	3.83533	4.03994	4.03921	4.05412	4.19595	2.63022	4.7665	4.7078	2.87961	3.56233	2.85315	4.4851	4.42526	2.91866
43	PD	74	Female	137.5	2.44514	3.26503	3.22149	4.73227	2.5557	2.68592	3.14703	2.79893	3.24702	3.77068	3.86853	4.17772	3.05369	3.94304	3.68167	3.09636	4.03125	2.36135	3.3536	2.42193	2.63799	3.19947	2.32838	4.54604	4.20286	2.81391	2.37694	2.625	4.6884	3.22774	2.84991	3.93041	4.0057	3.53581	3.90995	4.22075	2.77525	4.76885	4.65909	2.99484	4.60193	2.67043	4.36547	4.44815	3.24819
44	PD	66	Male	825	2.12516	3.27316	3.06543	4.72815	2.55497	2.74429	2.47202	2.78888	3.43398	3.72311	3.8755	4.43059	3.15091	3.81583	3.63164	3.41986	3.97407	2.34143	3.3536	2.35908	2.53517	3.19947	2.38721	4.72857	4.0651	3.06778	2.46494	3.06856	4.70227	3.77314	3.64726	3.8626	3.9991	4.06941	4.17503	4.23717	2.79211	4.70211	4.51387	2.8477	3.83307	2.66181	4.43907	4.4183	2.87227
45	PD	82	Female	300	2.23629	3.34217	3.15534	4.68937	2.66783	2.70484	2.43807	2.86159	3.32404	3.7988	3.82353	4.41299	2.90249	3.94304	3.70404	3.09636	4.2034	2.3298	3.3536	2.36267	2.5563	3.19947	2.24674	4.47688	4.12002	2.75143	2.39811	2.64365	4.7223	3.22774	2.91735	3.97262	3.78679	4.00649	4.0602	4.2723	2.69452	4.75383	4.70456	3.13348	3.81307	2.84973	4.03837	4.40144	3.17534
46	PD	71	Male	1640	2.40243	3.33987	3.10044	4.66041	2.6114	2.56015	2.48144	2.96242	3.24937	3.72688	3.79814	4.33069	2.85266	3.94304	3.90014	3.09636	4.09863	2.31366	3.3536	2.45939	2.50147	3.19947	2.16732	4.37345	4.11653	2.79824	2.38471	2.69862	4.71186	3.22774	2.8962	3.98526	3.68397	3.69432	3.76002	4.26449	2.82073	4.65672	5.11388	2.93399	3.33544	2.65031	4.2074	4.25575	3.26522
47	PD	70	Male	1000	2.21748	3.23601	3.15582	4.73425	2.61584	2.70655	2.44809	2.77634	3.3255	3.58231	3.84457	4.47504	3.2992	3.75387	3.6127	3.09636	3.98989	2.33365	3.3536	2.42553	2.55291	3.19947	2.34753	4.54171	3.95109	3.09068	2.51402	2.75089	4.65656	3.22774	2.87547	3.84576	3.93351	4.21782	4.19314	4.14955	2.66539	4.65451	4.7566	3.00165	3.40092	2.75435	4.41947	4.42855	3.41832
48	PD	75	Female	775	2.58184	3.32615	3.26914	4.71315	2.56726	2.80448	2.51415	2.89109	3.25561	3.75921	3.78741	4.61301	3.00587	4.13693	3.7352	3.09636	4.14098	2.34479	3.3536	2.42193	2.52905	3.19947	2.34439	4.60652	4.25783	3.00355	2.37894	2.79616	4.81941	3.30824	2.90233	3.79721	3.9646	4.14443	4.01578	4.28467	3.02061	4.77004	4.76836	3.07682	3.45524	2.68824	4.55889	4.34228	2.87622
49	PD	65	Male	100	2.39933	3.39503	3.23581	4.63837	2.5617	2.56348	2.44871	2.77371	3.29294	3.74215	3.76776	4.31785	3.05854	3.94304	3.69432	3.28551	4.04642	2.28058	3.3536	2.35832	2.4813	3.19947	2.24229	4.61627	4.15041	3.04376	2.42765	2.61847	4.72998	3.22774	2.856	3.97942	3.92696	4.07327	4.41896	4.22571	2.60853	4.73942	4.68875	2.94532	3.43829	2.70252	4.62226	4.27465	2.98046
50	PD	74	Male	1500	2.05308	3.33212	3.29464	4.80467	2.54765	2.59417	2.50893	2.77386	3.37438	3.57286	3.94718	4.29091	3.08493	3.94304	3.74562	3.09636	4.15702	2.40261	3.3536	2.41764	2.54133	3.19947	2.52427	4.66543	4.09112	3.26832	2.41481	2.74036	4.7561	3.26846	2.97474	3.92673	4.0393	4.36602	3.83802	4.28579	2.56407	4.69734	4.77483	3.03659	3.63823	2.7721	4.37858	4.15737	3.11942
51	PD	78	Male	100	2.12743	3.11687	3.19915	4.63812	2.65021	2.74811	2.48015	2.82743	3.32873	3.78443	3.77952	4.29765	3.02645	3.94304	3.70783	3.09636	4.17205	2.37585	3.47999	2.42797	2.55534	3.19947	2.37401	4.56045	4.01344	3.17	2.48187	2.71734	4.64824	3.22774	2.90843	3.96621	3.84922	4.33393	3.97098	4.2441	2.80482	4.71639	4.80095	3.08232	3.65571	2.71003	4.54928	4.38539	3.78713
52	PD	78	Female	883.2	1.88986	3.10082	3.1645	4.75921	2.70526	2.49485	2.50174	3.01267	3.25773	3.84189	3.84204	4.08394	2.78247	4.15551	3.6698	3.09636	4.15599	2.35392	3.3536	2.36305	2.53744	3.19947	2.31048	4.45865	4.13556	2.81285	2.33646	2.71046	4.77699	3.22774	2.93782	4.08696	3.97999	3.63544	4.08664	4.29568	2.81478	4.78006	5.01108	3.01924	3.56236	2.67339	4.14556	4.35715	2.82367
53	PD	67	Male	1199.8	2.3126	3.22714	3.241	4.73569	2.48458	2.71709	2.51135	2.82119	3.21672	3.63316	3.83271	4.37999	2.8262	3.94304	3.61578	3.09636	4.09435	2.35102	3.3536	2.38614	2.55691	3.19947	2.33626	4.72348	4.38535	2.84004	2.35603	2.65792	4.79276	3.22774	2.82685	3.83782	4.03639	4.01653	3.83933	4.2107	2.75686	4.8	4.64579	3.02202	3.51757	2.73894	4.22257	4.19397	2.81928
54	PD	80	Female	350	2.13418	3.20763	3.11998	4.7358	2.64157	2.56914	2.48671	2.80645	3.19857	3.56148	3.86333	4.42954	2.85558	3.94304	3.56824	3.09636	4.09482	2.36698	3.3536	2.40722	2.55035	3.19947	2.27989	4.5547	4.18996	2.86225	2.32777	2.70449	4.67821	3.22774	2.8799	3.8871	3.82731	3.89222	4.40047	4.17145	2.77452	4.7575	4.81905	3.04313	3.5903	2.69478	4.30042	4.33954	3.25508
55	PD	71	Female	775	1.98498	3.24751	3.20976	4.73041	2.53122	2.56644	2.45818	2.85691	3.30516	3.65005	3.87675	4.32935	3.06382	3.94304	3.65435	3.09636	4.09906	2.36829	3.3536	2.35832	2.57978	3.19947	2.30471	4.57499	3.89509	3.15433	2.38881	2.67284	4.74585	3.22774	2.82885	3.8733	3.81755	4.34299	4.24241	4.21616	2.54033	4.75999	4.71189	3.06733	3.83823	2.85552	4.53631	4.36613	2.95957
56	PD	79	Male	1099.8	2.1427	3.3267	3.03391	4.69084	2.51574	2.83117	2.47129	2.90617	3.32976	3.63889	3.73405	4.29321	3.1518	3.94304	3.64918	3.09636	4.11723	2.33846	3.3536	2.37949	2.56074	3.19947	2.25792	4.43984	3.96219	3.10449	2.38039	2.74958	4.73923	3.22774	2.87087	3.74377	3.65628	4.06842	3.96446	4.23496	2.65128	4.605	4.89113	3.01364	3.36728	2.75626	4.22046	4.27733	2.99726
57	PD	86	Female	0	2.74013	3.31716	3.15448	4.83858	2.79316	2.63165	2.45834	2.87731	3.38426	3.71518	3.88059	4.36294	2.93777	3.94304	3.52826	3.12411	4.09687	2.28217	3.3536	2.33021	2.53058	3.19947	2.32056	4.42789	3.84999	2.83065	2.3483	2.65533	4.62125	3.26236	3.09395	3.89899	4.07003	3.82406	3.97325	4.11264	2.48742	4.73184	4.75438	3.02796	3.57266	2.6288	4.30799	4.15463	3.2259
58	PD	74	Female	325	2.42325	3.34122	3.0943	4.71259	2.5506	2.79713	2.48044	2.79837	3.28167	3.58602	3.89945	4.45719	2.96218	3.82415	3.68952	3.58975	4.14093	2.35102	3.3536	2.41263	2.54158	3.19947	2.31006	4.64024	4.14194	2.8515	2.37767	2.69662	4.6618	3.22774	2.89944	3.78666	3.95981	4.08417	4.12331	4.19355	2.5463	4.73899	4.5938	2.92619	3.90227	2.73223	4.23734	4.29759	3.3354
59	PD	80	Female	0	1.81291	3.3356	3.10109	4.71499	2.65523	2.61826	2.47625	2.85169	3.29631	3.79671	3.85271	4.50213	3.077	3.94304	3.59937	3.09636	4.04485	2.28285	3.3536	2.35755	2.53958	3.19947	2.63296	4.59247	4.01959	3.03157	2.50037	2.73918	4.67786	3.22774	2.89763	3.73014	3.87121	4.42257	4.25811	4.18781	2.81491	4.74868	4.72695	3.15054	3.42724	2.75967	4.05361	4.11816	3.2413
60	PD	49	Male	0	2.7336	2.88981	3.04096	4.68588	2.65925	2.72738	2.59306	2.85902	3.25212	3.76931	3.83603	4.04374	2.81531	3.94304	3.714	3.09636	4.16935	2.34479	3.3536	2.36773	2.52048	3.19947	2.24773	4.69094	4.18167	2.90816	2.3485	2.68869	4.76145	3.22774	2.87743	3.81801	3.85914	3.86411	4.08373	4.29009	2.77056	4.84444	4.62207	2.83302	3.94448	2.68556	4.31889	4.58699	3.66655
61	PD	65	Male	1575	2.02078	3.36114	3.04618	4.74985	2.58297	2.57473	2.45637	2.85968	3.27814	3.66904	3.8604	4.55497	2.98232	3.94304	3.63592	3.09636	4.04217	2.32222	3.3536	2.36959	2.5557	3.19947	2.40705	4.60436	4.02778	2.85175	2.3587	2.66727	4.6644	3.22774	2.86058	3.8262	3.83507	4.00888	4.14612	4.20301	2.78824	4.79732	4.44927	3.09377	3.5346	2.74374	4.28102	4.27671	3.03822
62	PD	67	Female	2400	1.99211	3.34351	3.17803	4.73903	2.52994	2.76418	2.45849	2.73086	3.27084	3.66394	3.84367	4.63505	2.93636	3.94304	3.6909	3.09636	4.06482	3.83366	3.3536	2.40739	2.56372	3.19947	2.2824	4.58984	4.23607	2.94295	2.38453	2.64875	4.79764	3.22774	2.85431	3.93813	3.88173	4.19743	4.05012	4.25724	2.81882	4.79178	4.68488	3.0714	3.90448	2.75709	4.31457	4.62445	2.97336
63	PD	68	Female	1525	2.34183	3.02731	3.14971	4.64511	2.54827	2.92521	2.41128	2.75113	3.41916	3.63295	3.84812	4.80297	3.27335	3.76012	3.48312	3.09636	3.97216	2.37749	3.3536	2.43088	2.65137	3.19947	2.45378	4.68082	3.82951	3.46456	2.52009	2.90859	4.64473	3.22774	2.96788	3.68162	3.83607	4.70807	4.03029	4.02654	2.68628	4.72912	4.35231	2.97373	3.63128	2.69258	4.46537	4.28638	3.3167
64	PD	75	Male	999.75	1.95665	3.34694	3.10951	4.73784	2.613	2.77902	2.55315	2.75587	3.25382	3.67877	3.93027	4.44219	3.0117	3.94304	3.63477	3.09636	4.22621	2.33606	3.3536	2.36624	2.55242	3.19947	2.24353	4.63157	3.96168	3.13824	2.27761	2.76664	4.78256	3.22774	2.9095	3.87525	3.81813	4.14615	3.98249	4.16121	2.62767	4.68823	4.73109	2.93166	3.65941	2.63357	4.27407	4.20478	2.92257
65	PD	72	Female	1140	2.36021	3.42215	3.13101	4.71463	2.49982	2.73568	2.55084	2.77576	3.36985	3.77741	3.87476	4.21875	3.15881	3.94304	3.70477	3.12018	4.15555	2.34459	3.3536	2.43473	2.55534	3.19947	2.29226	4.70525	4.09254	3.3915	2.39863	2.69801	4.69901	3.22774	2.91566	3.78433	4.02912	4.27236	4.05623	4.2437	2.7767	4.77986	4.7007	3.08973	3.98429	2.69975	5.03266	4.51384	2.97044
66	PD	61	Male	3316	2.35622	3.29964	3.12499	4.50605	2.49234	2.60043	2.44514	2.79379	3.34797	3.68723	3.78355	4.49642	3.22621	3.94304	3.57181	3.23325	4.0231	2.45969	3.3536	2.38934	2.59262	3.19947	2.33021	4.58305	4.07844	3.14734	2.44483	2.7824	4.59404	3.22774	2.93596	3.81858	3.91045	4.54994	3.89869	4.09344	2.7492	4.68258	4.62468	3.04591	3.64009	2.70757	4.45737	4.40463	3.1631
67	PD	73	Male	700	2.09447	3.25018	3.1303	4.74415	2.59106	2.65196	2.51135	2.81525	3.27506	3.82368	3.82284	4.31751	2.95022	3.94304	3.65323	3.09636	4.04749	2.29951	3.3536	2.37328	2.51601	3.19947	2.266	4.65523	4.02207	2.87471	2.38489	2.67015	4.69305	3.22774	2.83708	3.86367	3.8649	4.13213	4.34954	4.21302	2.68673	4.7405	4.86683	2.8984	3.35597	2.93631	4.67339	4.48819	3.04005
68	PD	71	Female	666.5	2.05538	3.26335	3.24187	4.74552	2.47407	2.78923	2.50691	2.64237	3.25568	3.86001	3.8719	4.66603	3.01351	3.94304	3.62045	3.09636	4.0574	2.39533	3.3536	2.47392	2.58984	3.19947	2.31302	4.74327	3.92586	3.07478	2.34124	2.72746	4.77307	3.22774	2.87408	3.81092	3.8371	4.24561	3.99838	4.11105	2.82698	4.75774	4.39973	2.99926	3.83299	2.90988	4.35307	4.19856	3.0172
69	PD	66	Female	1850	2.36698	3.30754	3.04214	4.69817	2.45969	2.71883	2.53668	2.77452	3.38115	3.82333	3.84342	4.19049	2.97039	3.94304	3.70228	3.09636	4.07961	2.34772	3.3536	2.48416	2.55606	3.19947	2.31197	4.58678	4.29457	2.98963	2.36866	2.74107	4.79773	3.22774	2.9429	3.76716	3.82501	3.93101	3.96606	4.17838	2.60032	4.78197	4.37166	3.03918	3.8624	2.56384	4.50253	4.33715	2.93957
70	PD	64	Female	250	2.41764	3.3772	3.17313	4.72719	2.42488	2.5783	2.4853	2.8302	3.24679	3.73596	3.85797	4.38958	2.96745	3.94304	3.7178	3.09636	4.05876	2.33586	3.3536	2.39305	2.53794	3.19947	2.42111	4.40316	4.32284	2.91766	2.38614	2.65157	4.71774	3.22774	2.93707	3.90251	3.78988	4.03074	4.14314	4.2541	2.81842	4.79794	4.73544	3.03036	3.8217	2.59791	4.30137	4.24106	2.999
71	PD	69	Female	500	2.48001	3.39492	3.12629	4.54124	2.69073	2.55096	2.98078	2.84763	3.43279	3.55909	3.87596	4.16701	3.25404	3.94304	3.52238	3.09636	4.00495	2.30428	3.3536	2.4304	2.55859	3.19947	2.39287	4.51467	4.13867	3.63019	2.49136	2.7512	4.66903	3.22774	2.93807	3.94253	3.85516	4.6308	4.07112	4.07608	2.58354	4.77388	4.87401	3.17234	3.41712	3.02723	4.43688	4.36515	3.29535
72	PD	66	Male	900	2.55328	3.20852	3.09618	4.73592	2.55267	2.69346	2.45954	2.77532	3.30363	3.7899	3.81447	4.41248	2.9865	3.94304	4.51513	3.71679	4.00262	2.32366	3.3536	2.9347	2.53046	3.19947	2.35238	4.65721	4.17612	3.17281	2.54728	2.72648	4.77945	3.34633	3.86063	4.06628	4.06523	4.00513	3.90959	4.30162	2.65591	4.68573	4.73499	2.9598	3.64136	2.52088	4.33853	4.23776	2.8707
73	PD	65	Male	999.75	2.10687	3.3938	3.09545	4.65408	2.53782	2.9345	2.47436	2.85818	3.31235	3.77322	3.80903	4.35749	2.92252	3.94304	3.64443	3.09636	4.01314	2.36773	3.3536	2.35141	2.57484	3.19947	2.28668	4.68075	4.00458	2.94959	2.38703	2.715	4.68891	3.22774	2.90547	3.77738	4.02927	4.10044	4.01811	4.1602	2.65002	4.81085	4.26772	2.98735	4.03846	2.80202	4.55004	4.3028	3.02329
74	PD	66	Female	1636.6	2.38632	3.2882	3.15287	4.72216	2.47159	2.76827	2.59583	2.69845	3.26823	3.67299	3.8211	4.40252	2.94522	3.94304	3.68616	3.09636	4.14293	2.32715	3.3536	2.40671	2.56348	3.19947	2.2492	4.57059	4.33966	2.93495	2.34518	2.72493	4.73443	3.22774	2.87628	3.91838	3.84645	4.30833	3.91561	4.27382	2.50934	4.74576	4.75267	3.14048	3.85846	2.59901	4.28781	4.17069	2.98516
75	PD	68	Male	750	2.01536	3.30475	3.22727	4.70523	2.55449	2.63114	2.51759	2.87111	3.2905	3.76133	3.7733	4.43997	2.82354	3.94304	3.60151	3.09636	4.15702	2.344	3.3536	2.3865	2.58047	3.19947	2.27554	4.65247	4.19331	2.79253	2.38453	2.69618	4.77324	3.22774	2.86171	3.92797	3.84117	4.13943	4.00942	4.1989	2.82543	4.73023	4.61325	3.10602	3.39934	2.63568	4.44371	4.39585	3.32858
76	PD	63	Male	800	2.27021	3.34616	3.15679	4.79173	2.50092	2.73711	2.54033	2.73926	3.30585	3.73956	3.84634	4.87088	2.88576	3.94304	3.67032	3.09636	4.0633	2.35102	3.3536	2.3831	2.52427	3.19947	2.25018	4.74714	4.2909	2.93636	2.34967	2.66876	4.71416	3.22774	2.88717	3.83241	3.808	3.94129	4.05245	4.27158	2.62921	4.75882	4.62315	3.04017	3.47025	2.74749	4.43867	4.25442	3.19992
77	PD	83	Female	749.9	2.17231	3.26368	3.10762	4.76289	2.44107	2.7155	2.4312	2.96402	3.31902	3.72214	3.74768	4.53887	3.0558	3.94304	3.69009	3.09636	4.03236	2.37236	3.3536	2.37985	2.51308	3.19947	2.26316	4.59991	3.99514	3.19717	2.35102	2.63276	4.87137	3.22774	2.92737	3.91469	3.68252	3.97733	4.32407	4.27882	2.58013	4.69199	4.79667	3.09304	3.41716	2.90509	4.1421	4.10964	2.94399
78	PD	64	Female	775	2.02531	3.29872	3.15207	4.65167	2.55618	2.70424	2.45879	2.77452	3.29137	3.65875	3.82214	4.51028	3.1848	3.94304	3.62731	3.09636	4.09902	2.31175	3.3536	2.3742	2.5611	3.19947	2.33062	4.50717	4.22082	3.37405	2.41179	2.7113	4.75259	3.22774	2.87558	3.92441	3.83583	4.53236	3.98314	4.24729	2.64227	4.73994	4.60493	2.97437	3.8944	2.71324	4.18952	4.33947	3.10673
79	PD	82	Male	450	2.16406	3.28391	3.10123	4.61919	2.54949	2.64885	2.42226	2.79316	3.33393	3.58484	3.88347	4.24571	3.10643	3.94304	3.58022	3.09636	4.03152	2.29645	3.3536	2.37731	2.52543	3.19947	2.24279	4.64488	4.14529	3.10646	2.38399	2.74225	4.6914	3.22774	2.93252	3.90741	3.86581	4.1961	4.28941	4.17039	2.99352	4.77607	4.61004	2.93263	3.49908	2.74265	4.51575	4.42794	3.29977
80	PD	69	Male	1050	2.06032	3.18458	3.1233	4.63367	2.67403	2.72509	2.4304	2.76012	3.38043	3.65577	3.84632	4.33472	3.36025	3.94304	3.47845	3.09636	3.98216	2.33905	3.3536	2.45879	2.59693	3.19947	2.40002	4.60088	4.07801	3.51516	2.50718	2.82334	4.64621	3.22774	2.97007	3.82078	3.90785	4.75748	3.95851	4.0271	2.71037	4.72313	4.85995	2.8055	3.52244	2.81657	4.14566	4.22035	3.22534
81	PD	71	Male	1150	2.2388	3.26484	3.16364	4.74476	2.47246	2.73616	2.54679	2.72738	3.24672	3.83738	3.90201	4.57137	2.79274	3.94304	3.74206	3.09636	4.10696	2.54357	3.3536	2.42029	2.5534	3.19947	2.23528	4.69854	4.06012	2.89165	2.40722	2.68015	4.80477	3.22774	2.84733	3.90619	3.8576	3.50814	3.97341	4.33379	2.93308	4.77539	4.797	2.96251	3.74743	2.64542	4.53355	4.39767	2.84905
82	PD	71	Male	799.8	1.93902	3.23568	3.20499	4.78558	2.47654	2.58024	2.5506	2.72247	3.29853	3.77973	3.86573	4.31547	2.93892	3.94304	3.76632	3.09636	4.1528	2.36698	3.3536	2.39881	2.55811	3.19947	2.32035	4.67169	3.98704	2.85866	2.3881	3.71645	4.67232	3.36303	2.93247	4.06178	3.9557	3.83667	4.08453	4.31161	2.62941	4.80901	4.89629	3.06043	3.63127	2.68708	4.47794	4.3535	3.0477
83	PD	65	Female	1066.5	2.09691	3.28337	3.12571	4.62375	2.549	2.44917	2.4627	2.90482	3.27476	3.70222	3.85053	4.38844	2.95395	3.94304	3.65527	3.09636	4.01469	2.3075	3.3536	2.35064	2.53033	3.19947	2.2492	4.64144	4.06605	3.08853	2.3296	2.66736	4.68684	3.22774	2.89393	3.99194	3.80242	4.05649	4.11093	4.20728	2.53403	4.72276	4.81458	3.17653	3.34766	2.6981	4.32273	4.30245	3.44626
84	PD	63	Male	650	2.08135	3.23353	3.24856	4.65394	2.45209	2.70544	2.4729	2.78718	3.2899	3.66935	3.90251	4.38624	2.9874	3.94304	3.66845	3.09636	4.03579	2.35851	3.3536	2.36959	2.53033	3.36241	2.31302	4.64988	4.12456	3.05545	2.38703	2.68178	4.69704	3.22774	2.84628	3.91588	3.94999	4.02612	4.02269	4.2406	2.8844	4.78326	4.69692	2.90607	3.59822	2.78916	4.68779	4.34521	3.02784
85	PD	65	Male	1200	2.11361	3.38039	3.15452	4.71608	2.70757	2.57171	2.41313	2.84142	3.32913	3.5886	3.90624	4.33642	3.08372	3.94304	3.63738	3.09636	3.9654	2.30771	3.3536	2.36455	2.5432	3.19947	2.26269	4.71738	4.02228	3.20615	2.38453	2.68502	4.62076	3.22774	2.88587	3.89765	4.02619	4.31812	4.09296	4.18567	2.58794	4.77637	4.7388	2.90752	3.58207	2.80686	4.29834	4.36297	2.99673
86	PD	64	Female	520	2.38256	3.40126	3.12405	4.65365	2.42716	2.55618	2.53794	2.71525	3.38408	3.88047	3.81415	4.43156	3.11484	3.94304	3.70872	3.09636	4.12606	2.37088	3.3536	2.41697	2.56205	3.19947	2.30146	4.59115	4.19306	2.9599	2.43072	2.65839	4.78617	3.22774	2.83601	3.93633	3.8096	4.3678	3.96257	4.29854	2.87216	4.74916	4.59635	2.90703	3.99177	2.67321	4.8485	4.43348	3.2595
87	PD	69	Male	1450	2.02202	3.37894	3.18279	4.74348	2.5989	2.66389	2.50461	2.77539	3.28203	3.65955	3.90019	4.38446	3.01381	3.94304	3.59711	3.09636	4.09841	2.42144	3.3536	2.38166	2.59857	3.19947	2.3189	4.57247	4.08813	2.91829	2.38489	2.75717	4.69467	3.22774	2.87471	4.02695	3.96553	4.17913	3.88969	4.1875	2.62325	4.66744	4.87922	3.0454	3.38798	2.69117	4.34843	4.26703	3.12525
88	PD	63	Male	850	2.24229	3.22536	3.14404	4.64946	2.55823	2.59129	2.51402	2.69144	3.24944	3.78642	3.86753	4.10718	3.14073	3.94304	3.62774	3.09636	4.11061	2.36286	3.3536	2.4096	2.5636	3.19947	2.27114	4.71887	3.77082	3.0425	2.35679	2.73862	4.71606	3.22774	2.82743	3.79222	3.93539	4.491	3.86845	4.04813	2.77699	4.72101	4.7757	2.88434	3.40771	2.70603	4.26258	4.33206	2.99007
89	PD	85	Female	500	2.31112	3.34618	3.14696	4.76746	2.57955	2.69179	2.48287	2.93782	3.27987	3.75703	3.82683	4.4458	2.86314	4.06138	3.73319	3.09636	4.2054	2.36996	3.3536	2.37475	2.58546	3.19947	2.32408	4.48634	4.18215	2.98313	2.3707	2.70603	4.71659	3.22774	2.89867	3.91741	3.7767	3.69275	4.06318	4.27603	2.63799	4.79099	4.89848	3.07434	3.64943	2.81511	4.24502	3.96234	2.96993
90	PD	71	Male	1400	1.92428	3.26837	3.1412	4.70801	2.53567	2.81445	2.54654	2.82988	3.32691	3.81063	3.83698	4.17246	2.9248	3.94304	3.65782	3.09636	3.98897	2.39252	3.3868	2.47085	2.55979	3.19947	2.46672	4.53408	4.12857	3.0083	2.38703	2.719	4.72622	3.22774	2.88576	3.87237	3.96158	4.0196	4.02172	4.19571	2.57761	4.71444	4.82381	2.98932	3.37319	2.79113	4.58912	4.40787	3.11109
91	PD	77	Female	0	2.09447	3.32656	3.11012	4.7143	2.59494	2.74507	2.52009	2.81178	3.24197	3.69175	3.80532	4.21125	3.22948	3.94304	3.55973	3.09636	4.01013	2.32387	3.3536	2.43696	2.50987	3.19947	2.33905	4.58002	3.95932	3.16755	2.39533	2.88423	4.7421	3.22774	2.87846	3.80591	3.65508	4.35741	3.99076	4.16831	2.75944	4.75906	4.70099	3.11381	3.71368	2.85144	4.38173	4.26576	3.23855
92	PD	56	Male	600	2.1014	3.13783	3.13354	4.58584	2.52466	2.72008	2.47188	2.77641	3.23251	3.64077	3.89879	4.39258	3.03647	3.94304	3.53438	3.09636	4.03136	2.31806	3.3536	2.37822	2.54654	3.19947	2.29314	4.69908	3.98401	2.9741	2.35025	2.68377	4.68222	3.24037	2.89498	3.91795	3.85908	4.1056	4.43964	4.09108	2.7992	4.80384	4.47354	2.88064	3.94298	2.7387	4.47901	4.47038	3.06055
93	PD	67	Male	150	1.94596	3.27492	3.16221	4.74227	2.57634	2.74476	2.55943	2.73791	3.25744	3.71946	3.84518	4.44496	2.93141	3.94304	3.76802	3.09636	4.11274	2.3604	3.3536	2.41078	2.54419	3.19947	2.33486	4.65425	4.18114	2.77576	2.39637	2.66708	4.73207	3.22774	2.86504	3.87623	3.96731	3.79452	4.17789	4.29517	2.62562	4.73135	4.63023	3.05869	3.44475	2.70148	4.67292	4.37897	2.90461
94	PD	67	Male	600	2.32552	3.38148	3.16841	4.68881	2.37876	2.72973	2.65523	2.80726	3.27005	3.7247	3.845	4.55656	2.96506	3.81115	3.67722	3.09636	3.91647	2.32325	3.3536	2.47611	2.58984	3.19947	2.36586	4.64402	4.07463	2.9344	2.40637	2.74343	4.65758	3.22774	2.83759	3.81082	3.9401	4.0826	4.20201	4.212	2.64562	4.72863	4.61741	3.00924	3.33556	4.09878	4.45045	4.14138	3.05084
95	PD	79	Male	0	2.35545	3.21696	3.09054	4.55943	2.70252	2.67514	2.35583	2.84423	3.28267	3.76004	3.75549	4.63176	2.93682	3.94304	3.50352	3.09636	3.93836	2.25164	3.3536	2.2383	2.49982	3.19947	2.26834	4.56314	3.94558	2.96858	2.38148	2.84354	4.53555	3.22774	2.86225	3.84543	3.734	4.44304	4.40108	4.03479	2.613	4.79228	4.41574	2.85703	3.71236	2.95158	4.19301	4.43202	3.20063
96	PD	73	Male	550	2.63276	3.26347	3.19421	4.60495	2.6637	2.77822	2.43632	2.79837	3.37219	3.76813	3.79939	4.29558	3.20008	3.94304	3.53287	3.11783	4.02248	2.30492	3.3536	2.40976	2.5266	3.19947	2.34928	4.58851	4.05362	3.25549	2.42226	2.73823	4.57369	3.22774	2.89165	3.83603	3.96414	4.25109	4.30922	4.09136	2.79581	4.70497	4.70802	2.95012	3.55835	2.79588	4.4918	4.44485	3.41566
97	Normal	>90	Male	0	2.27761	3.30666	3.2578	4.82867	2.83065	2.75151	2.51081	2.95207	3.22668	3.79485	3.92735	4.28388	2.89243	4.0424	3.62606	3.13207	4.14579	2.30276	3.3536	2.40088	2.51799	3.19947	2.22686	4.71425	4.07204	2.61511	2.32366	2.65581	4.67201	3.22774	2.99904	3.90777	3.89667	3.62999	4.06063	4.21	2.61826	4.76297	4.74424	2.70935	3.7784	2.63053	4.12028	4.32058	3.18749
98	Normal	83	Male	0	2.64385	3.33218	3.10264	4.83895	2.65021	2.56855	2.5231	2.83104	3.32015	3.73265	3.82676	4.06803	2.76418	4.04698	3.71297	3.09636	4.16722	2.35334	3.3536	2.427	2.52427	3.19947	2.26998	4.68258	4.33552	2.804	2.39568	2.67815	4.78497	3.22774	2.8472	4.01114	3.92616	3.87269	3.86192	4.27337	2.63739	4.76953	4.96728	2.83123	3.44389	2.77844	4.24285	4.30373	3.10911
99	Normal	77	Male	0	2.31069	3.01907	3.36992	5.03804	2.80168	2.625	2.41597	2.89548	3.18775	3.63939	3.86397	4.16279	2.79442	3.94304	3.62152	3.41019	4.13428	2.24229	3.75907	2.29929	2.69425	3.19947	2.30168	4.68341	3.80104	2.86469	2.76087	2.63528	4.71941	3.24569	3.18061	3.89873	4.04659	4.03188	3.87521	4.03916	2.59682	4.68896	4.97265	2.92681	3.45603	2.60531	4.20021	4.365	3.12001
100	Normal	63	Female	0	1.97035	3.35187	3.24002	4.68061	2.5302	2.76567	2.49527	2.71223	3.46575	3.74065	3.76088	4.7701	3.634	3.94304	3.6205	3.44685	4.08687	2.32428	3.3536	2.59306	2.63769	3.77216	3.3353	4.59593	3.95828	3.22704	2.54593	2.78937	4.75872	3.34895	3.26524	3.83394	3.8071	4.55505	4.39375	4.17661	2.71675	4.73348	4.62084	3.04583	3.73652	2.68753	4.35105	4.52469	3.32135
101	Normal	62	Male	0	2.46657	3.20518	3.07423	4.65836	2.50352	2.80182	2.46982	2.70174	3.29422	3.84643	3.78254	4.57998	3.12421	3.94304	3.66189	3.09636	4.06551	2.36922	3.3536	2.39305	2.53933	3.19947	2.29048	4.4758	4.17809	3.22253	2.42797	2.66266	4.75815	3.22774	2.89636	3.90349	3.96392	4.25995	4.02371	4.20125	2.65849	4.78029	4.53461	2.96515	4.07007	2.73783	4.60745	4.50599	3.13383
102	Normal	71	Male	0	2.18837	3.32995	3.15266	4.68683	2.48968	2.60638	2.44483	2.7854	3.2929	3.40109	3.83878	4.50902	2.98731	3.94304	3.70249	3.09636	4.06159	2.38274	3.3536	2.39358	2.54481	3.19947	2.27944	4.67774	4.21966	3.04151	2.32201	2.66811	4.77505	3.22774	2.79	3.9333	3.77626	3.97786	4.03715	4.27261	2.7277	4.78359	4.63476	2.96237	3.54829	2.75089	4.45071	4.23885	3.19959
103	Normal	58	Male	0	2.23121	3.32459	3.26164	4.65272	2.59062	2.94226	2.51388	2.78965	3.50885	3.73323	3.83158	4.57756	3.67883	3.81619	3.49826	3.62908	3.9501	2.27485	3.39529	2.66633	2.63819	3.33421	2.46805	4.71157	4.2792	3.18053	2.73167	2.86171	4.67283	3.47012	3.47018	3.78502	3.99333	4.40928	4.47008	4.03658	2.71273	4.7794	4.28536	3.03011	3.53536	2.76268	4.22515	4.45652	3.55018
104	Normal	53	Male	0	2.29003	3.50889	3.15479	4.69897	2.44529	2.65379	2.46909	2.7532	3.31433	3.70615	3.88681	4.33658	2.98985	3.94304	3.72567	3.1521	4.11109	2.32613	3.3536	2.45879	2.52582	3.19947	2.2413	4.73888	4.26748	2.85986	2.43088	2.716	4.69906	3.25382	2.96061	3.92368	4.05585	3.65153	4.01584	4.298	2.79865	4.75647	4.53196	3.11461	3.51291	2.90558	4.15718	4.35005	3.22097
105	Normal	77	Female	0	2.01703	3.29581	3.23307	4.68757	2.75297	2.60097	2.50065	2.84067	3.45375	3.91701	3.8378	4.27733	3.48896	4.05687	3.5798	3.3739	4.08061	2.24353	3.3536	2.57345	2.56514	3.23739	2.37803	4.45227	4.31889	2.98878	2.45803	2.78633	4.6896	3.30809	3.23322	3.93743	3.78458	4.61658	4.21968	4.14366	2.78269	4.72728	4.84394	3.10948	3.48545	2.67742	4.20583	4.37978	3.28228
106	Normal	62	Female	0	2.19811	3.53808	3.22719	4.61862	2.46731	2.51068	3.13529	2.74663	3.27976	3.85939	3.85767	4.43601	2.93541	3.94304	3.66981	3.09636	4.0441	2.3438	3.3536	2.37346	2.55943	3.19947	2.28914	4.62549	4.36283	2.94072	2.35698	2.708	4.75692	3.22774	2.86794	3.93274	3.84983	3.94799	3.88913	4.23541	2.73878	4.78159	4.63509	3.08704	3.6658	2.58252	4.08312	4.24642	3.19626
107	Normal	74	Female	0	2.03663	3.39289	3.23935	4.62933	2.40875	2.75404	2.54394	2.74702	3.47376	3.84128	3.85753	4.46391	3.49378	3.94304	3.65501	3.49084	4.09918	2.27669	3.3536	2.63809	2.63508	3.29636	2.41764	4.5993	4.25639	3.07795	2.48073	2.80462	4.73675	3.35889	3.30942	3.88634	3.91301	4.13667	4.2598	4.25387	2.57795	4.80245	4.46963	2.95852	4.10489	2.70612	4.43398	4.48969	3.19103
108	Normal	64	Female	0	1.86153	3.34883	3.23947	4.73888	2.4833	2.78254	2.58001	2.76185	3.25794	3.93395	3.54888	4.40161	2.95463	3.94304	3.76109	3.09636	4.13963	2.38453	3.3536	2.43297	2.55194	3.19947	2.24428	4.76117	4.03317	2.89321	2.42325	2.64266	4.77203	3.22774	2.82445	3.92241	4.07778	3.96634	3.99452	4.17569	2.69258	4.7565	4.83419	3.09191	4.00834	2.82458	4.4832	4.38589	3.08461
109	Normal	55	Male	0	2.33224	3.39236	3.26771	4.66401	2.39707	2.80092	2.47698	2.76916	3.2394	3.29108	3.82714	4.62355	3.08682	3.81928	3.6716	3.09636	3.99933	2.34869	3.3536	2.40243	2.55084	3.19947	2.27807	4.5981	4.10282	2.92947	2.39985	2.66351	4.70969	3.22774	2.868	3.72681	3.85824	4.43987	3.89058	4.22389	2.93687	4.72386	4.57679	3.08225	3.69036	2.98263	4.02651	4.36254	3.1122
110	Normal	66	Male	0	2.46389	3.29798	3.15333	4.59673	2.61584	2.68744	2.44311	2.71408	3.31105	3.67699	3.76251	4.59647	3.14236	3.94304	3.56968	3.09636	3.9974	2.33526	3.3536	2.36922	2.53744	3.19947	2.2572	4.632	4.0188	3.12084	2.39182	2.72008	4.802	3.22774	2.84497	3.82084	3.80881	4.58552	3.96883	4.15196	2.68958	4.79788	4.42284	2.87402	3.44119	2.72558	4.28116	4.22892	3.14426
111	Normal	84	Female	0	2.13545	3.20933	3.10789	4.7482	2.61836	2.7577	2.49108	2.85394	3.50254	3.869	3.82006	4.40517	3.20058	3.94304	3.68319	3.32212	4.20498	2.28713	3.3536	2.52427	2.52543	3.19947	2.29092	4.51009	4.16616	2.81398	2.40722	2.94231	4.7511	3.71077	3.15415	3.90066	4.11672	3.56652	4.21326	4.16467	2.86735	4.73113	4.89065	2.98717	3.44706	2.67578	4.28601	4.44168	3.17499
112	Normal	85	Female	0	2.34928	3.15397	3.1586	4.68639	2.734	2.68601	2.41631	2.8707	3.35378	3.59084	3.78561	4.44661	3.19571	3.94304	3.6058	3.09636	4.05921	2.31973	3.3536	2.38846	2.53744	3.19947	2.28126	4.56149	4.07065	3.06431	2.41111	2.68233	4.72613	3.22774	2.89911	3.92248	3.74385	4.54589	4.07864	4.16972	2.75412	4.7277	4.77292	3.01456	3.70333	2.80502	4.2376	4.15122	3.26088
113	Normal	89	Female	0	2.30643	3.34565	3.24554	4.5697	2.55739	2.79796	2.49262	2.85625	3.36642	3.8335	3.85427	4.68865	3.1831	3.94304	3.64309	3.35828	4.10363	2.34694	3.3536	2.42341	2.54728	3.19947	2.24773	4.39908	4.08146	2.90918	2.3784	2.65437	4.74418	3.34912	3.09781	3.89349	3.85949	4.43566	4.16772	4.13944	2.6013	4.85723	4.58704	3.13529	3.78557	2.72989	4.48279	4.39868	3.21184
114	Normal	64	Male	0	2.47857	3.31526	3.12911	4.7091	2.48344	2.83575	2.51014	2.73328	3.24107	3.78069	3.84628	4.58943	2.87564	3.94304	3.69316	3.09636	4.13589	2.37328	3.3536	2.43838	2.56632	3.19947	2.27989	4.69015	4.17288	2.73727	2.37785	2.63043	4.74463	3.22774	2.86004	3.92986	4.07972	3.81419	4.09569	4.23543	2.80895	4.74948	4.34724	2.88689	3.94358	2.75305	4.73621	4.45714	3.02865
115	Normal	63	Male	0	2.08171	3.37129	3.14023	4.56242	2.6902	2.87904	2.45194	2.80195	3.35151	3.83172	3.89025	4.61841	3.33732	3.94304	3.54	3.2382	4.03009	2.30168	3.3536	2.46598	2.5534	3.19947	2.28623	4.64024	4.11693	3.38444	2.36116	2.69784	4.81115	3.22774	3.07471	3.74775	3.8688	4.6317	4.20945	4.10344	2.63407	4.83676	4.42391	3.06461	3.57196	2.74733	4.62536	4.42167	3.28865
116	Normal	65	Female	0	2.14737	3.38915	3.24324	4.65657	2.65954	2.62232	2.5193	2.91819	3.43546	3.62577	3.83513	4.52311	3.5398	3.94304	3.58634	3.42123	4.02811	2.26316	3.3536	2.60119	2.5885	3.25431	2.30428	4.35575	4.29806	3.30544	2.47958	2.7638	4.75885	3.33562	3.28028	3.94902	3.88623	4.40525	4.2468	4.16724	2.90988	4.71398	4.88971	3.04438	3.47016	2.66605	4.25984	4.4269	3.26174
117	Normal	83	Female	0	2.73941	3.34031	3.21227	4.67926	2.49941	2.80584	2.49859	2.8598	3.39957	3.86725	3.8683	4.78011	3.33538	3.94304	3.64488	3.35818	4.04202	2.30103	3.51379	2.5197	2.56984	3.23626	2.43648	4.52743	4.07551	3.08066	2.45347	2.72288	4.7642	3.26961	3.15585	3.81702	3.76003	4.35372	4.273	4.22326	2.5422	4.78173	4.5876	2.98762	3.80258	2.65706	4.75688	4.51095	3.28196
118	Normal	63	Male	0	1.989	3.26409	3.09293	4.68857	2.63377	2.69099	2.45621	2.74989	3.36803	3.76813	3.77023	4.5131	3.16292	3.94304	3.54291	3.09636	4.14712	2.43775	3.3536	2.40432	2.56726	3.19947	2.3543	4.62158	3.96562	3.11143	2.37585	2.73424	4.72167	3.22774	2.9014	3.86646	3.88005	4.68296	3.98494	3.99355	2.55497	4.74692	4.40793	3.07522	3.89011	2.84504	4.28869	4.18673	3.26926
119	Normal	68	Female	0	2.3694	3.34335	3.17615	4.55131	2.55582	2.63306	2.47929	2.79477	3.42744	3.73017	3.72342	4.6513	3.21016	4.06066	3.64883	3.09636	4.11873	2.34044	3.3536	2.45728	2.57484	3.19947	2.33606	4.42997	4.26283	3.37053	2.52517	2.66464	4.76832	3.22774	2.89812	3.96879	4.04667	4.65757	3.80098	4.20107	2.70919	4.70639	4.84635	2.95564	3.50323	2.72469	4.41087	4.36616	3.33482
120	Normal	>90	Female	0	1.85003	3.29914	3.26252	4.833	2.60304	2.89564	2.47494	2.79456	3.36354	3.78421	3.79043	4.42106	3.16492	3.94304	3.68219	3.09636	4.22644	2.36549	3.60191	2.43616	2.51654	3.19947	2.25455	4.57924	4.16855	3.31813	2.40518	2.65839	4.82335	3.22774	2.85733	4.00654	3.85985	4.60223	3.87738	4.21414	2.9127	4.82373	4.91644	2.91861	3.98884	2.73576	4.69352	4.61631	3.51627
121	Normal	85	Female	0	2.33122	3.16507	3.14628	4.7709	2.63629	2.88485	2.44778	2.72933	3.43183	3.58063	3.83366	4.38176	3.35042	3.94304	3.50817	3.09636	4.12687	2.34811	3.3536	2.48302	2.56808	3.21283	2.45086	4.65138	4.07225	3.56258	2.49248	2.76604	4.74044	3.22774	3.00208	3.78056	3.65514	4.73232	3.88572	3.99969	2.69425	4.71688	4.5821	3.04265	4.09356	3.38059	4.52791	4.13731	3.42778
122	Normal	70	Male	0	2.256	3.37243	3.12437	4.63653	2.59483	2.71834	2.52231	2.74889	3.36175	3.75266	3.93232	4.5956	3.02518	3.74803	3.69545	3.34288	4.05757	2.33264	3.3536	2.32899	2.58546	3.19947	2.26951	4.72163	3.95751	2.88281	2.31175	2.76975	4.71244	3.36063	2.93354	3.73362	3.76609	4.10254	4.08594	4.22301	2.47698	4.80634	4.47817	2.81684	3.71064	2.66549	4.67294	4.40797	3.14535
123	Normal	68	Male	0	1.97174	3.3275	3.15439	4.63431	2.46627	2.71933	2.41347	2.79204	3.32278	3.67185	3.79682	4.61786	3.27602	3.81122	3.65522	3.09636	4.05025	2.33203	3.3536	2.39602	2.56514	3.19947	2.25624	4.5395	4.01543	3.1002	2.4553	2.73183	4.69753	3.22774	2.84862	3.80413	3.739	4.20837	4.01195	4.21425	2.62128	4.66871	4.56664	2.98601	3.64933	2.76042	4.28209	4.33444	3.20882
124	Normal	61	Male	0	2.40071	3.29533	3.1951	4.581	2.4961	2.82982	2.51148	2.72575	3.28952	3.67834	3.85612	4.65664	3.09475	3.94304	3.62063	3.09636	4.14474	2.36791	3.3536	2.40807	2.56265	3.19947	2.24846	4.69211	4.03681	3.2642	2.38632	2.73175	4.71967	3.22774	2.84899	3.86213	3.91714	4.38372	3.96291	4.16854	2.65495	4.76925	4.31716	3.05185	3.38603	2.63002	4.20869	4.37947	3.28201
125	Normal	63	Female	0	2.12057	3.26771	3.30989	4.65332	2.54419	2.54307	2.45117	2.79127	3.32764	3.73017	3.77934	4.20552	3.15863	3.94304	3.57571	3.09636	4.0466	2.32879	3.3536	2.36791	2.51508	3.19947	2.25696	4.55105	4.01128	3.45057	2.44311	2.65571	4.7318	3.22774	2.84868	3.87266	3.99778	4.4433	3.91065	3.98502	2.48558	4.78518	4.5895	3.06006	3.98981	2.89337	4.68065	4.42494	3.14164
126	Normal	71	Female	0	2.56867	3.40106	3.1756	4.71344	2.52401	3.08884	2.5458	2.78204	3.2964	3.8466	3.82215	4.68386	3.06055	3.94304	3.76744	3.09636	4.2163	2.39005	3.3536	2.48657	2.52853	3.19947	2.2878	4.53433	4.1277	3.24731	2.49803	2.74989	4.69693	3.24339	2.99904	3.90818	3.91324	4.42954	3.85932	4.28312	2.74351	4.75301	4.71246	3.01912	3.86291	3.47845	4.24926	4.37811	3.17754
127	Normal	64	Male	0	2.24846	3.37308	3.29092	4.65701	2.5783	2.79588	2.56122	2.85558	3.5095	3.61659	3.89946	4.33779	3.66752	3.94304	3.57664	3.59683	4.07845	2.25188	3.37723	2.71634	2.67715	3.37212	2.38881	4.67922	4.21567	2.9926	2.57183	2.875	4.74708	3.43406	3.43694	3.7949	4.08832	3.83258	4.3699	4.08455	2.62808	4.7884	4.59745	2.77393	3.57131	2.65619	4.70465	4.51487	3.32537
128	Normal	66	Male	0	3.00677	3.47942	2.92153	4.68701	2.59162	3.55979	2.40295	2.86082	3.24932	3.67939	3.8106	4.57073	2.71775	3.94304	3.62238	3.28276	4.06715	2.21669	3.47735	2.3831	2.50092	3.19947	2.45545	4.61257	4.08775	2.73304	2.3566	2.62706	4.66432	3.41417	2.83378	3.82162	4.08371	3.39419	3.84125	4.15559	2.67715	4.75087	4.64091	2.93085	3.62226	3.22611	4.37052	4.1915	3.17429
129	Normal	65	Female	0	2.39707	3.37561	3.19912	4.77929	2.53631	2.66745	2.47319	2.75166	3.28946	3.65338	3.86987	4.36296	3.00745	3.94304	3.75143	3.09636	4.16436	2.3485	3.3536	2.427	2.56324	3.19947	2.25864	4.68904	4.24006	2.88423	2.41313	3.08718	4.77122	3.22774	2.93013	3.68511	4.00031	4.04612	3.88747	4.25419	2.62716	4.78701	4.51732	3.04509	3.84868	3.061	4.48774	4.53314	3.27119
130	Normal	79	Male	0	2.32387	3.21977	3.16394	4.82869	2.62972	2.89465	2.4922	2.78533	3.71171	3.72558	3.7895	4.56119	3.02869	3.94304	3.63433	3.09636	4.14624	2.35813	3.3536	2.65792	2.54481	3.19947	2.27393	4.64896	4.1208	3.09965	2.40586	2.68833	4.80021	3.22774	2.89287	3.93298	3.85161	4.33239	4.00109	4.20287	3.42192	4.6974	4.72403	2.92942	3.97566	2.762	4.44241	4.11158	3.18583
131	Normal	67	Female	0	2.64326	3.32422	3.24559	4.72856	2.62655	2.71416	2.48116	2.69845	3.35191	3.80208	3.81362	4.47953	3.23644	3.94304	3.67294	3.09636	4.12287	2.40875	3.3536	2.44451	2.55497	3.19947	2.31471	4.63828	4.09185	3.26602	2.42439	2.6886	4.88092	3.22774	2.93737	3.85353	3.84296	4.66334	3.94941	4.17484	2.70122	4.81484	4.45194	2.95751	3.92389	2.7653	4.23699	4.33964	3.23601
132	Normal	79	Male	0	2.37144	3.32174	3.20981	4.75041	2.67587	2.72583	2.47828	2.86195	3.28682	3.7198	3.81605	4.42538	2.96218	3.94304	3.62072	3.09636	4.24613	2.31702	3.3536	2.36922	2.51574	3.19947	2.24846	4.61585	4.05568	3.00368	2.35411	2.59912	4.747	3.22774	2.98304	3.85848	3.96441	3.66385	4.09352	4.18611	3.45063	4.6979	4.76233	2.84023	3.94701	3.00894	4.54064	3.96728	3.17208
133	Normal	72	Male	0	2.59483	3.29341	3.16973	4.69451	2.67925	2.65992	2.53046	2.82092	3.387	3.76244	3.851	4.47799	3.2465	3.94304	3.65383	3.38222	4.13249	2.31154	3.3536	2.50215	2.55931	3.20666	2.306	4.62069	4.07901	2.8654	2.45393	2.70595	4.71064	3.24284	3.1447	3.88489	4.08146	4.15756	4.23238	4.23059	2.72362	4.71199	4.71438	2.96374	3.6729	2.66483	4.56668	4.35117	3.31612
134	Normal	61	Male	0	2.49388	3.28147	3.14189	4.54112	2.52297	2.68984	2.44979	2.74084	3.29497	3.54095	3.8053	4.7685	2.93932	3.94304	3.68731	3.09636	4.02383	2.33965	3.3536	2.36192	2.55642	3.19947	2.25091	4.67835	4.16074	3.04379	2.40364	2.65571	4.71547	3.22774	2.8264	3.93065	3.92805	4.33699	3.96046	4.20562	2.66755	4.73131	4.33484	2.7693	3.72574	2.79393	4.40822	4.01624	3.2444
135	Normal	68	Male	0	2.30081	3.28812	3.1411	4.57843	2.54506	2.70731	2.50772	2.7165	3.41537	3.79615	3.77885	4.83204	3.36222	3.94304	3.58989	3.09636	4.10019	2.36791	3.3536	2.48216	2.56301	3.19947	2.35679	4.59014	4.05589	3.21982	2.4929	2.70612	4.79818	3.22774	2.908	3.77986	3.91101	4.49892	4.10354	4.20117	2.6535	4.80555	4.35189	2.95168	3.64117	3.42067	4.63879	4.33316	3.39118
136	Normal	81	Female	0	2.56194	3.337	3.04489	4.81454	2.60347	2.97465	2.5042	2.71567	3.35974	3.82313	3.88194	4.39151	3.09286	3.94304	3.63968	3.19667	4.14691	2.33143	3.3536	2.48954	2.55437	3.19947	2.52763	4.71052	4.17367	2.68895	2.39375	2.73038	4.77128	3.3363	3.04567	3.89208	3.90012	3.68628	4.0646	4.18565	2.55883	4.80046	4.5227	2.91965	4.15669	2.68088	4.37877	4.2709	3.12707
137	Normal	68	Male	0	1.83885	3.43854	3.13344	4.62189	2.47929	2.52853	2.51825	2.76559	3.24197	3.7994	3.82856	4.29358	2.95832	3.94304	3.69089	3.09636	4.02296	2.34242	3.3536	2.40088	2.53744	3.19947	2.61993	4.61225	3.90362	2.9425	2.40858	2.6637	4.77798	3.22774	2.87116	3.86943	4.04802	4.26155	3.82253	4.24155	2.7457	4.73268	4.68058	2.96802	3.5479	2.68681	4.29204	4.32937	3.13411
138	Normal	59	Female	0	2.2003	3.42298	3.20669	4.80962	2.53605	2.69975	2.54864	2.77902	3.26771	3.80318	3.89858	4.3761	2.77546	3.94304	3.75942	3.09636	4.1216	2.43712	3.3536	2.43185	2.55425	3.19947	2.27989	4.68174	4.14828	2.76619	2.38543	2.65562	4.75069	3.22774	2.85071	3.92677	4.21879	3.68935	3.77838	4.24202	2.58297	4.86733	4.67283	2.979	3.97586	2.78739	4.17146	4.13345	3.06767
139	Normal	53	Female	0	2.17667	3.44854	3.1903	4.70585	2.4685	2.77605	2.49955	2.8038	3.18279	3.86172	3.83828	4.30609	2.80003	3.94304	3.69806	3.09636	4.24327	2.46	3.456	2.42732	2.60746	3.19947	2.58883	4.75269	4.21594	2.71257	2.38987	2.69073	4.81068	3.22774	2.88564	3.87602	3.90431	3.52139	3.77712	4.19501	2.61763	4.89537	4.36361	3.14903	4.20203	2.78604	4.37484	4.47988	3.15712
140	Normal	76	Female	0	2.50311	3.28843	3.26628	4.68524	2.58928	2.69749	3.26731	2.88446	3.51456	3.65601	3.85537	4.37359	3.67914	3.94304	3.53451	3.5852	4.04487	2.22968	3.38358	2.71634	3.11106	3.40111	2.43441	4.56941	4.30467	3.1964	2.63518	2.86421	4.63037	3.43476	3.43255	3.77637	3.76313	4.56949	4.42768	4.0999	2.71925	4.72857	4.95056	2.88338	3.64845	2.65562	4.64549	4.57563	3.63034
141	Normal	70	Female	0	2.78902	3.45843	3.21719	4.71272	2.39375	2.84862	2.51228	2.73664	3.45266	3.74655	3.82576	4.63672	3.43228	3.94304	3.6606	3.4805	4.01631	2.2907	3.3536	2.64601	2.60108	3.306	2.32428	4.55781	4.20446	3.06009	2.5427	2.75914	4.75864	3.31781	3.22466	3.75865	3.86629	4.38583	4.45912	4.20824	2.72689	4.77786	4.54946	3.06179	3.78686	2.79113	4.68084	4.43336	3.3266
Passed QC ( N = 968)	CV < 20%				NO	YES	YES	YES	YES	YES	YES	YES	YES	YES	YES	YES	YES	YES	YES	YES	YES	YES	YES	YES	YES	YES	YES	YES	YES	YES	YES	YES	YES	YES	YES	YES	YES	YES	YES	YES	YES	YES	YES	YES	YES	YES	YES	YES	YES
	Inside of LLOD and ULOD (> 75%)				NO	YES	YES	YES	YES	YES	YES	YES	YES	YES	YES	YES	YES	NO	YES	NO	YES	YES	NO	YES	YES	NO	YES	YES	YES	YES	YES	YES	YES	NO	YES	YES	YES	YES	YES	YES	YES	YES	YES	YES	YES	YES	YES	YES	YES
[truncated: 1,084 more columns]
